# Supplementary material for: An IBBCEAS system for atmospheric measurements of glyoxal and methylglyoxal in the presence of high NO 2 concentrations
Source: Copernicus journal article supplement (doi:10.5194/amt-12-4439-2019), 2019-08-21
Supplement: Supplementary file 1 [file amt-12-4439-2019-supplement.pdf]

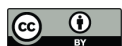

## *Supplement of*

# **An IBBCEAS system for atmospheric measurements of glyoxal and methylglyoxal in the presence of high NO<sub>2</sub> concentrations**

**Jingwei Liu et al.**

*Correspondence to:* Xin Li (li\_xin@pku.edu.cn)

The copyright of individual parts of the supplement might differ from the CC BY 4.0 License.

## Supplement summary

Supplement pages: 10

Supplement sections: 1

Supplement tables: 1

5 Supplement figures: 7

### Sections:

Section S1: Model simulation of evaluating the NO<sub>2</sub> photolytic convertor

### Tables:

Table S1: Initial concentration of species included in the model simulation

### 10 Figures:

Figure S1: Spectral actinic flux inside the photolysis cell of the NO<sub>2</sub> photolytic convertor.

Figure S2: Model calculated concentrations of NO<sub>2</sub>, O<sub>3</sub>, GLY, and MGLY in the photolysis cell of the NO<sub>2</sub> photolytic convertor.

Figure S3: Model calculated concentrations, production rates, and destruction rates of GLY and MGLY in the photolysis cell of the NO<sub>2</sub> photolytic convertor.

15 Figure S4: Model calculated concentrations, production rates, and destruction rates of GLY and MGLY in the photolysis cell of the NO<sub>2</sub> photolytic convertor. The initial concentrations of NMHCs in the model are set to 10 times of the values listed in in Table S1.

Figure S5: Diagram of the standard gas generator for GLY and MGLY.

Figure S6: NO<sub>2</sub> concentrations measured with and without purge gas.

20 Figure S7: MGLY concentrations retrieved from different spectral fitting ranges.

### Section S1. Model simulation of evaluating the NO<sub>2</sub> photolytic convertor

In order to evaluate the NO<sub>2</sub> photolytic convertor (NPC) while sampling an atmospheric background of VOCs, a model simulation of the gas in photolytic cell was performed. Given the size of the photolysis cell (i.e., a cylinder with 60 mm length and 13.4 mm inner diameter) and the sampling flow rate of 2 L/min, the residence time of the sampled air in the cell is about  
25 0.25 s. In such a short period, the productions of GLY and MGLY in the cell is negligible which can be verified by model simulations.

The model includes the full MCM chemistry (version 3.3.1, <http://mcm.leeds.ac.uk/MCM/>) for all NMHCs and their oxidation products. The initial concentrations of OH, HO<sub>2</sub>, O<sub>3</sub>, NO, HONO, CO, CH<sub>4</sub>, C<sub>2</sub>-C<sub>12</sub> NMHCs are set to the average values

obtained during a field observation campaign in 2018 in Yangtze River Delta, China (see Table S1). The total OH reactivity due to NMHCs is  $3.1 \text{ s}^{-1}$ . The relative humidity, temperature, and pressure are constrained by the campaign averages, i.e., 60%, 300 K, 1007.65 hPa, respectively. The photolysis frequencies are constrained by values calculated from the spectral actinic flux inside the cell (Fig. S1). The spectral actinic flux is estimated by the LED emission spectrum and by the concentration change of NO, NO<sub>2</sub>, and O<sub>3</sub> when NO<sub>2</sub> standard (100 ppb) is running through the system. The initial values of NO<sub>2</sub>, GLY, MGLY are set to 60 ppb, 100 ppt, and 100 ppt, respectively. Figure S2 shows the calculated concentrations of NO<sub>2</sub>, O<sub>3</sub>, GLY, and MGLY for the period of 0.25 s residence time. While the NO<sub>2</sub> concentration drops from 60 ppb to 15 ppb leading to an increase of O<sub>3</sub> concentration by approximately 45 ppb, the change of GLY and MGLY concentrations is only around 1%. As shown in figure S3, the production rate of GLY and MGLY increases to around  $5 \text{ ppb h}^{-1}$  which could only result in maximumly 0.34 ppt increase of GLY and MGLY. Even if we increase the initial NMHCs concentration in the model by a factor of 10 (i.e., the OH reactivity due to NMHCs increases to  $31 \text{ s}^{-1}$ ), the maximum production of GLY and MGLY within 250 ms is less than 2 ppt which is only 2% of their initial concentration (Fig. S4). Since the NMHCs concentration in the model represents typical atmospheric condition influenced by urban air pollution, our model simulation clearly shows that the NPC can be used in the field observations for removing NO<sub>2</sub> without additional production of GLY and MGLY.

15

**Table S1.** Initial concentration of species included in the model simulation.

| Species   | Concentration          | Species  | Concentration |
|-----------|------------------------|----------|---------------|
| OH        | $10^7 \text{ cm}^{-3}$ | NO       | 0.60 ppb      |
| HO2       | $10^9 \text{ cm}^{-3}$ | HONO     | 0.45 ppb      |
| CH4       | 1.9 ppm                | CO       | 0.33 ppm      |
| O3        | 70.00 ppb              | SO2      | 1.33 ppb      |
| NO2       | 60 ppb                 | MGLY     | 100.0 ppt     |
| GLY       | 100.0 ppt              | TOLUENE  | 0.515 ppb     |
| C2H2      | 1.000 ppb              | NC8H18   | 0.034 ppb     |
| CBUT2ENE  | 0.050 ppb              | EBENZ    | 0.140 ppb     |
| C2H4      | 0.900 ppb              | MXYL     | 0.045 ppb     |
| C2H6      | 2.130 ppb              | NC9H20   | 0.019 ppb     |
| IC4H10    | 0.380 ppb              | OXYL     | 0.076 ppb     |
| IC5H12    | 0.330 ppb              | STYRENE  | 0.017 ppb     |
| NC4H10    | 0.650 ppb              | IPBENZ   | 0.012 ppb     |
| NC5H12    | 0.240 ppb              | PBENZ    | 0.014 ppb     |
| PENT1ENE  | 0.004 ppb              | METHTOL  | 0.016 ppb     |
| TPENT2ENE | 0.002 ppb              | PETHTOL  | 0.015 ppb     |
| C5H8      | 0.233 ppb              | NC10H22  | 0.017 ppb     |
| CPENT2ENE | 0.003 ppb              | TM135B   | 0.014 ppb     |
| M22C4     | 0.019 ppb              | OETHTOL  | 0.036 ppb     |
| M23C4     | 0.020 ppb              | TM123B   | 0.014 ppb     |
| M2PE      | 0.100 ppb              | PXYL     | 0.045 ppb     |
| M3PE      | 0.076 ppb              | NC11H24  | 0.019 ppb     |
| HEX1ENE   | 0.009 ppb              | C3H8     | 2.010 ppb     |
| NC6H14    | 0.130 ppb              | C3H6     | 0.120 ppb     |
| M2HEX     | 0.030 ppb              | C4H6     | 0.005 ppb     |
| CHEX      | 0.044 ppb              | TM124B   | 0.016 ppb     |
| M3HEX     | 0.041 ppb              | TBUT2ENE | 0.002 ppb     |
| BENZENE   | 0.364 ppb              | BUT1ENE  | 0.040 ppb     |
| NC7H16    | 0.055 ppb              |          |               |

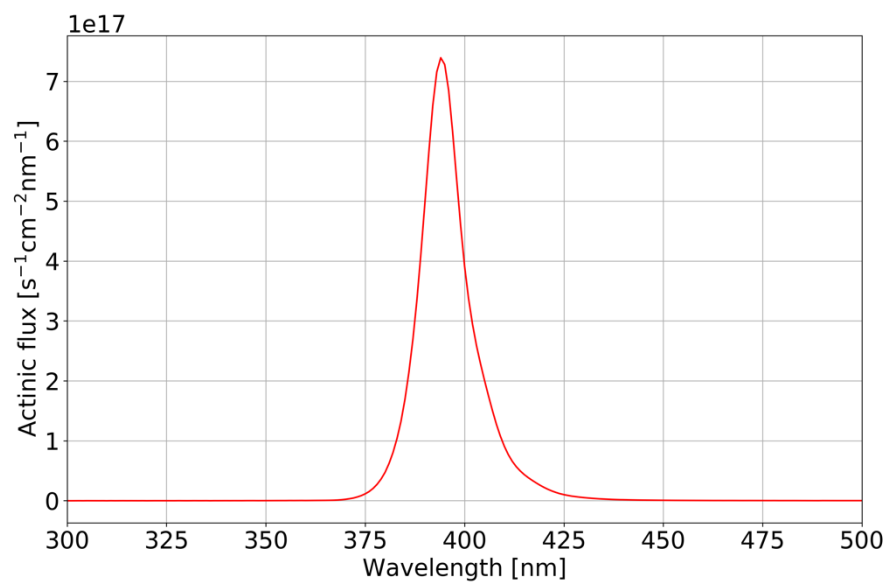

**Figure S1.** Spectral actinic flux inside the photolysis cell of the NO<sub>2</sub> photolytic convertor (NPC).

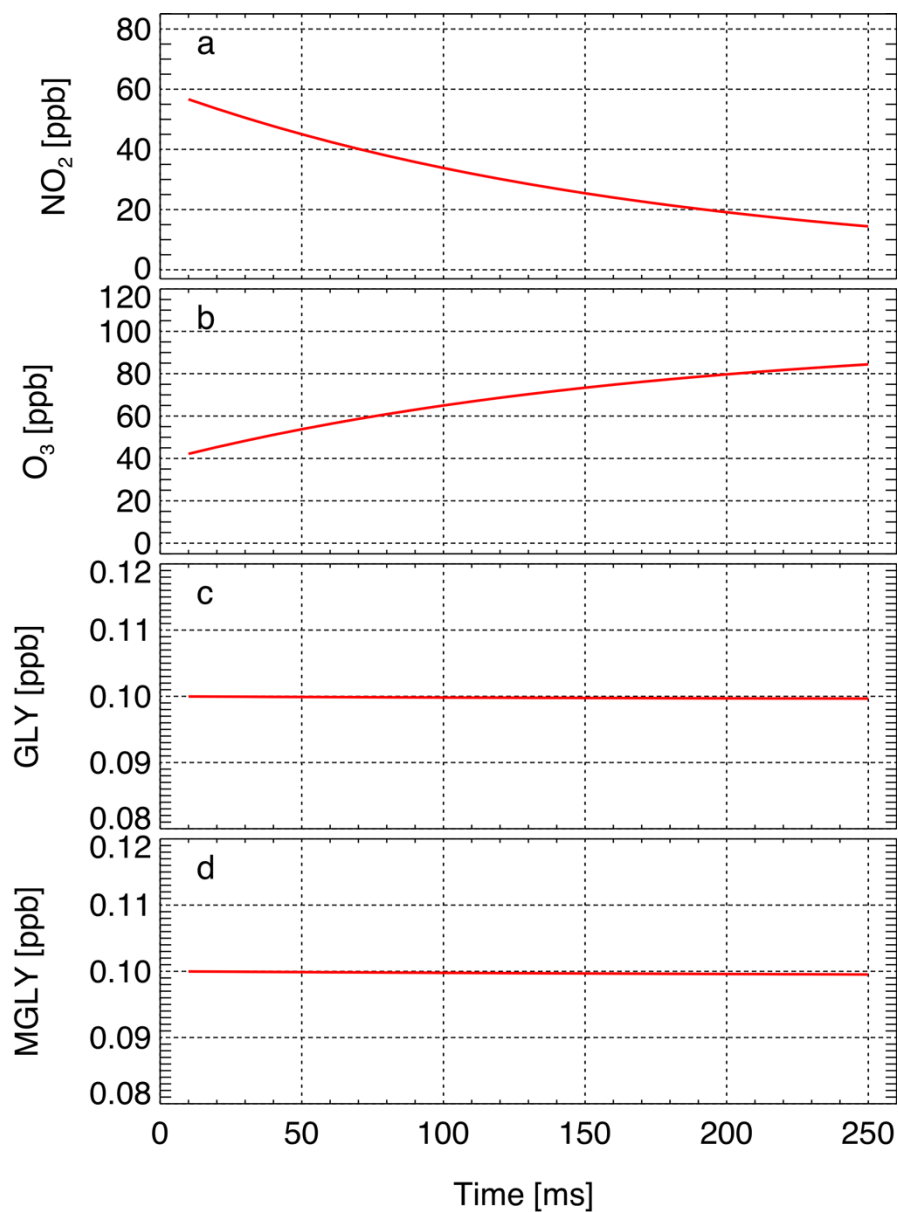

**Figure S2.** Model calculated concentrations of  $\text{NO}_2$  (a),  $\text{O}_3$  (b), GLY (c), and MGLY (d) in the photolysis cell of the  $\text{NO}_2$  photolytic converter. Note that the concentrations at 250 ms represent the condition of the sampled air exits the cell, since the residence time in the cell is about 250 ms.

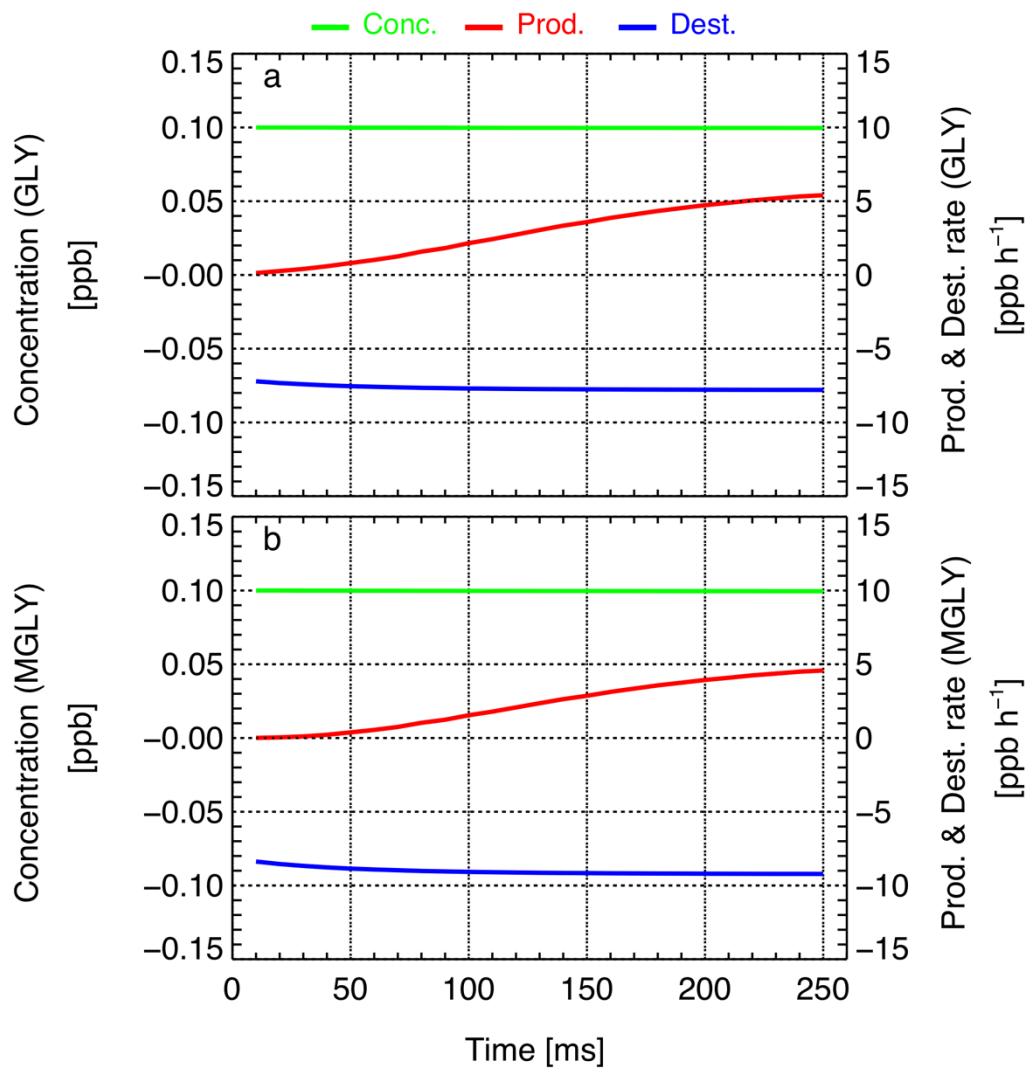

**Figure S3.** Model calculated concentrations (green), production rates (red), and destruction rates (blue) of GLY (a) and MGLY (b) in the photolysis cell of the NO<sub>2</sub> photolytic convertor. Note that the concentrations at 250 ms represent the condition of the sampled air exits the cell, since the residence time in the cell is about 250 ms.

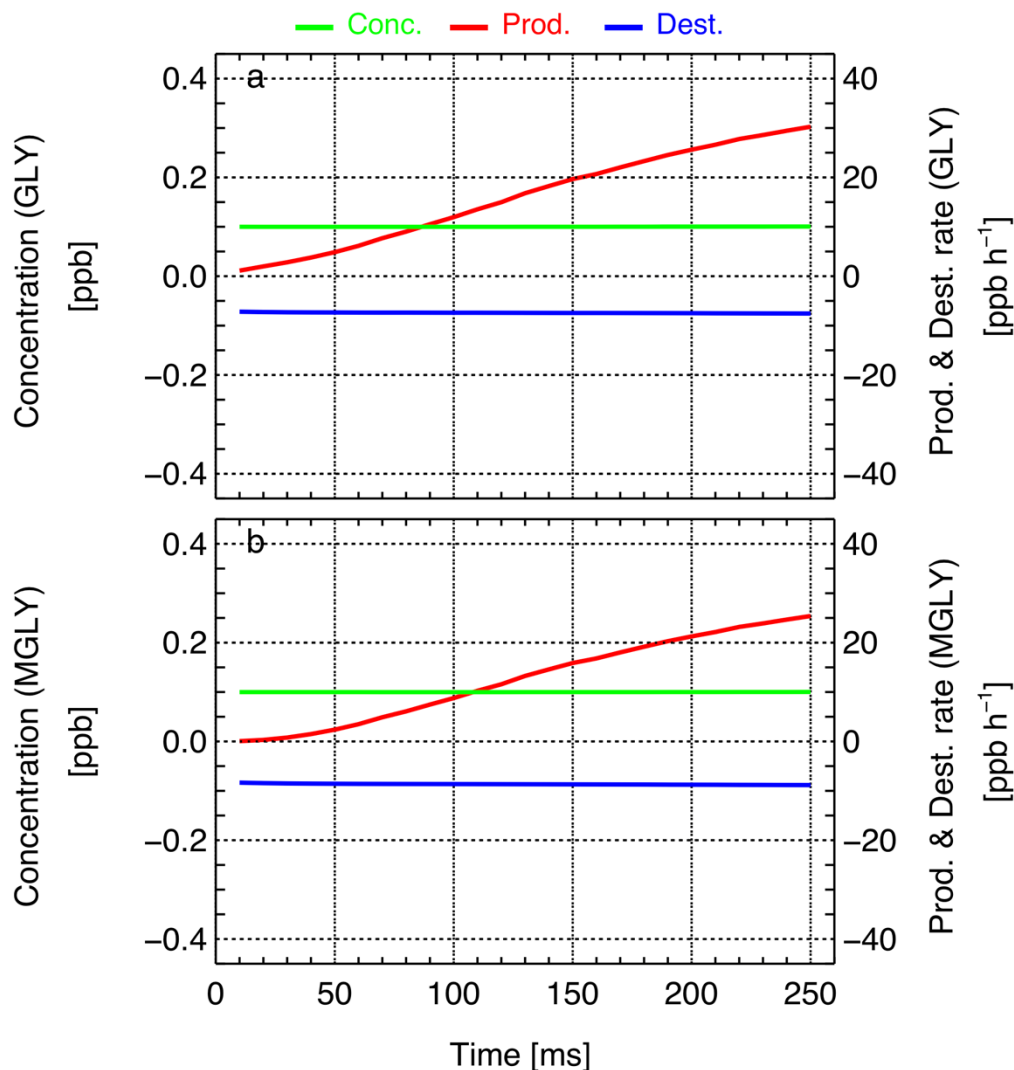

**Figure S4.** Model calculated concentration (green), production rate (red), and destruction rate (blue) of GLY (a) and MGLY (b) in the photolysis cell of the NO<sub>2</sub> converter. The initial concentrations of NMHCs in the model are set to 10 times of the values listed in in Table S1. Note that the concentrations at 250 ms represent the condition of the sampled air exits the cell, since the residence time in the cell is about 250 ms.



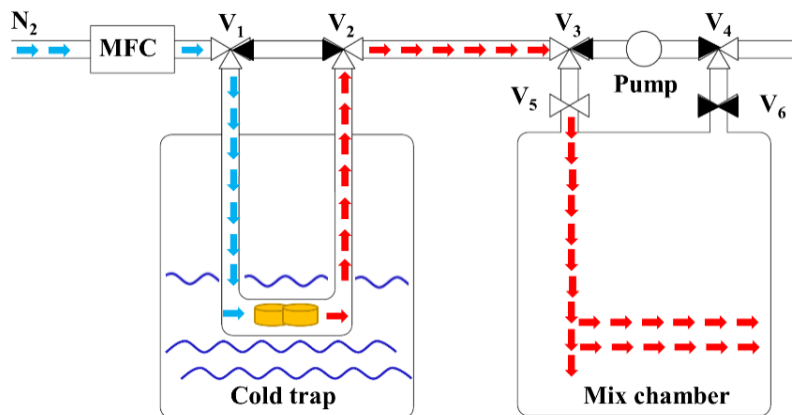

**Figure S5.** Diagram of the standard gas generator for GLY and MGLY. The temperature of cold trap ( $-72\text{ }^{\circ}\text{C}$ ) is achieved by mixing dry ice and ethanol. The volume of the mixing chamber is 50 L. When mixing gases in the mix chamber, flow rate of the pump is set to 20 L/min.

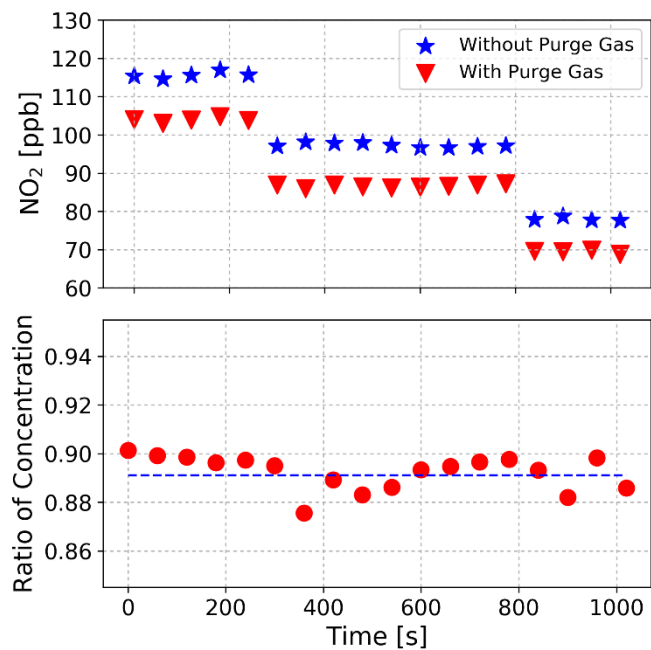

**Figure S6.** NO<sub>2</sub> concentrations measured with and without purge gas. The ratio of NO<sub>2</sub> concentration with 100 mL/min purge flows and 2 L/min sampling flow fluctuated around 0.89 (blue dotted line) and standard deviation of these ratios is 0.0056.

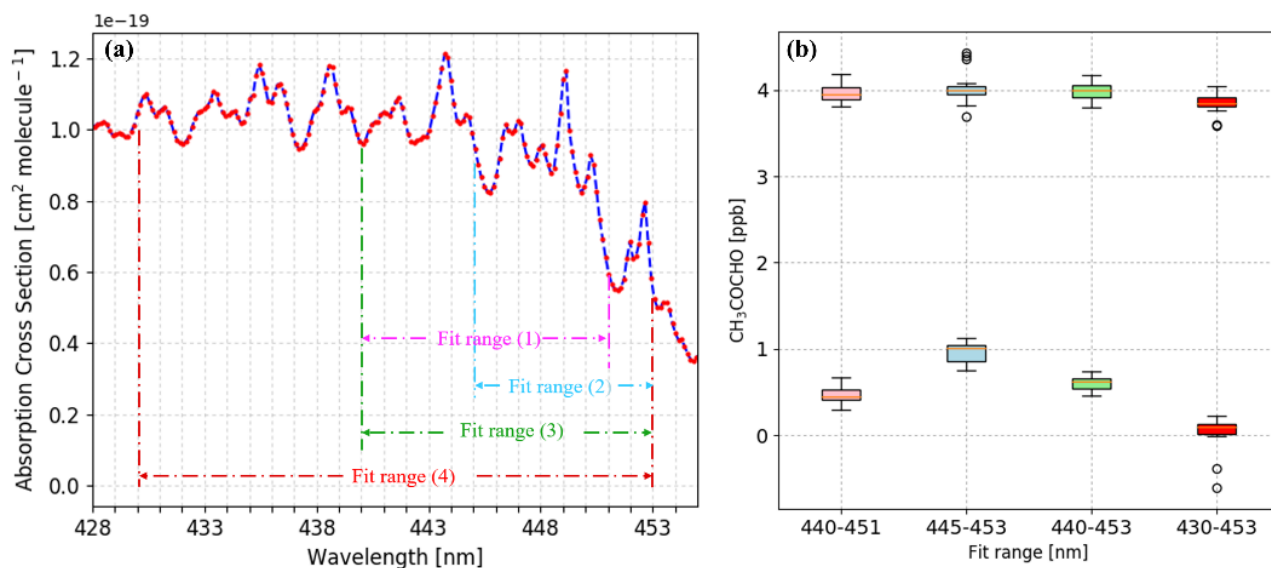

**Figure S7.** (a) Four spectral fit ranges (440-451 nm, 445-453 nm, 440-453 nm, and 430-453 nm) for MGLY. (b) Each spectral fit range was used to fit two experimental sets of MGLY produced by the standard gas generator. Experimental results of both sets indicated that fit range has a great influence on the fitted concentrations of MGLY.
